# Supplementary material
Source: Research Square preprint supplement (doi:10.21203/rs.3.rs-9192785/v1)
Supplement: Supplementary file 1 [file 9e9f20d76e9448aa2684f606.docx]

**Appendix A**

**Supplementary material for review**

Table 2

Coding book

| **Main Theme** | **Subtheme** | **Definition of the Subtheme** | **Answered Research Question** | **Illustrative Quotation** |
| --- | --- | --- | --- | --- |
| **1. Generative AI as a Tool for Educational Opportunity** | Personalized learning support | Students perceive GenAI as a tool that provides individualized explanations, adaptive assistance, and step-by-step guidance that respond to different learning needs and academic abilities. | RQ1 | “It explains the lesson in a simpler way and according to what I need, so it feels like having a tutor available all the time” (P4). |
|  | Accessibility for diverse learners | Students describe GenAI as supporting learners with different linguistic, cognitive, and educational needs, including non-native speakers and students who need alternative ways of engaging with content. | RQ1 | “As a student who sometimes struggles with academic English, AI helps me organize my ideas and improve my writing” (P11). |
|  | Reduced cognitive load | Students report that GenAI reduces effort spent on routine or repetitive academic tasks, allowing greater focus on understanding, analysis, and creative work. | RQ1 | “It saves me time on basic tasks, so I can spend more energy thinking about the actual content” (FGS1P3). |
|  | Academic confidence and capacity building | Students view GenAI as helping them strengthen foundational knowledge, improve the quality of their academic work, and feel more capable in completing university tasks. | RQ1 | “Sometimes I use it to check if I am on the right track, and that gives me more confidence in my work” (P15). |
| **2. Risks of Inequality and Exclusion in GenAI Use** | Unequal access to advanced AI tools | Students express concern that differences in access to paid or more advanced AI tools create unfair academic advantages and deepen existing inequalities among learners. | RQ1, RQ2 | “Students who can pay for the better version definitely get better help than those using the free one” (P7). |
|  | Bias in AI-generated outputs | Students perceive that GenAI may reproduce cultural, linguistic, racial, gendered, or socioeconomic biases embedded in training data, which can marginalize some groups of learners. | RQ1, RQ2 | “Sometimes the examples it gives do not reflect our context at all, as if education only happens in Western settings” (FGS2P8). |
|  | Exclusion through AI detection practices | Students report that AI detection tools may unfairly target or misclassify authentic student work, particularly affecting students with diverse writing styles or learning needs. | RQ2 | “What worries me is that even if I write by myself, the detector may still accuse me, and that feels unfair” (P19). |
|  | Digital and technical barriers | Students identify poor internet access, limited digital resources, and insufficient technological infrastructure as barriers that restrict equitable participation in AI-supported learning. | RQ2 | “Sometimes access itself is the problem, because not everyone has stable internet or devices to use these tools properly” (FGS1P6). |
| **3. Academic Benefits of GenAI in Learning Practices** | Enhanced productivity and efficiency | Students explain that GenAI improves the speed and efficiency of academic work by assisting with summarizing, editing, organizing, and information management. | RQ1 | “It helps me summarize long readings and structure my assignments much faster” (P2). |
|  | Creativity and brainstorming support | Students use GenAI to generate ideas, initiate writing, and overcome difficulty starting assignments, presentations, or projects. | RQ1 | “When I do not know how to start, it gives me ideas that help me move forward” (FGS2P11). |
|  | Support for discipline-specific tasks | Students, particularly in technical and scientific fields, describe using GenAI for coding support, data analysis, error checking, and task-specific academic assistance. | RQ1 | “In programming tasks, it helps me find errors and understand what is wrong in the code” (P10). |
| **4. Limitations and Challenges of GenAI in Higher Education** | Inaccuracy and hallucination | Students note that GenAI can produce false, outdated, misleading, or fabricated information, which raises concerns about reliability in academic work. | RQ1, RQ2 | “Sometimes it gives an answer that sounds correct, but later I discover that the information is wrong” (P9). |
|  | Overreliance and weakened critical engagement | Students worry that frequent dependence on GenAI may reduce independent thinking, problem-solving, deep reading, and reflective learning. | RQ1, RQ2 | “If students depend on it too much, they may stop thinking deeply and just accept the answer” (FGS1P2). |
|  | Ethical ambiguity and academic integrity concerns | Students express uncertainty regarding plagiarism, authorship, acceptable use, and the ethical boundaries of using AI in academic settings. | RQ2 | “The problem is that nobody clearly explains where support ends and cheating begins” (P13). |
|  | Limited depth of understanding | Students perceive that GenAI often provides surface-level responses that may not support the deep, specialized, or critical understanding required in higher education. | RQ1 | “It is useful for general ideas, but not always for deep or specialized understanding” (FGS2P14). |
|  | Limited prompt literacy | Students report difficulty in formulating effective prompts, which affects the relevance, quality, and usefulness of AI-generated responses. | RQ2 | “If you do not know how to ask properly, the answer becomes too general and not useful” (P5). |
|  | Privacy and data protection concerns | Students raise concerns about how personal data, uploaded materials, and academic content may be stored, used, or exposed through AI platforms. | RQ2 | “I am not always comfortable uploading my work because I do not know what happens to the data” (P21). |
| **5. Patterns of Student Adoption and Engagement** | Active adoption for academic support | Students describe integrating GenAI into their academic routines as a practical tool for assistance, efficiency, and support. | RQ1 | “It has become part of how I study, especially when I need quick explanations or feedback” (P1). |
|  | Selective or cautious use | Some students report using GenAI carefully and in limited ways, balancing its benefits with concerns about ethics, accuracy, and dependency. | RQ1, RQ2 | “I use it, but only in certain tasks, because I do not trust it completely” (FGS1P5). |
|  | Deliberate non-use to preserve human learning | Some students intentionally avoid GenAI because they value direct engagement with learning and wish to maintain their personal competencies and independence. | RQ1 | “Sometimes I avoid using it because I want to challenge myself and learn by doing the work on my own” (P17). |
| **6. Institutional Conditions for Equity and Inclusion** | Structured AI literacy training | Students emphasize the need for systematic training to develop AI literacy, including basic use, critical evaluation, and responsible engagement with AI tools. | RQ3 | “The university should train students on how to use AI responsibly, not just warn them about it” (FGS2P4). |
|  | Prompting and evaluative skills development | Students identify the need for support in writing effective prompts, verifying outputs, recognizing bias, and assessing the quality of AI-generated information. | RQ3 | “We need to learn how to ask good questions and how to check whether the answers are accurate” (P8). |
|  | Tiered and inclusive training opportunities | Students suggest that AI training should be differentiated according to prior experience and learner needs to ensure inclusive participation for all students. | RQ3 | “Not all students start from the same level, so training should be designed for beginners and advanced users separately” (FGS1P7). |
| **7. Equitable Support and Resource Provision** | Subsidized or institutionally provided AI tools | Students call for equitable access to high-quality AI tools through free, licensed, or subsidized institutional provision. | RQ3 | “If the university wants fairness, it should provide equal access instead of leaving students to pay on their own” (P6). |
|  | Accessibility-oriented AI supports | Students highlight the value of specialized AI tools that support students with disabilities or diverse learning needs, such as speech-to-text or audio-based tools. | RQ3 | “These tools can be very helpful for students who need different ways to read, write, or organize learning” (FGS2P17). |
|  | Safe institutional AI platforms | Students prefer university-approved or internally developed AI systems that better protect privacy, data security, and academic integrity. | RQ3 | “I would trust AI more if it was provided and monitored by the university itself” (P14). |
| **8. Policy, Governance, and Ethical Guidance** | Clear institutional guidelines | Students stress the importance of explicit guidance on when, where, and how AI may be used across different academic tasks and assessments. | RQ3 | “What we need most is clear policy, because right now students are confused about what is allowed” (P3). |
|  | Transparency in AI use | Students support policies that encourage honest disclosure of AI use rather than blanket prohibition or punitive enforcement. | RQ3 | “I think students should be allowed to use it, but they should clearly explain how they used it” (FGS1P4). |
|  | Student involvement in policy development | Students believe that AI-related policies should be shaped collaboratively with student input to ensure fairness, relevance, and practicality. | RQ3 | “Students should have a voice in these policies because we are the ones directly affected by them” (FGS2P10). |
| **9. Pedagogical Transformation in the AI Era** | Authentic and process-based assessment | Students recommend assessment approaches that emphasize process, reflection, oral defense, and authentic performance rather than easily AI-generated outputs. | RQ3 | “Assessment should focus more on what students can explain, defend, and apply, not only what they submit” (P12). |
|  | AI as a supportive learning partner | Students prefer pedagogical approaches that position AI as a tool for tutoring, brainstorming, and feedback rather than as a replacement for learning or critical thinking. | RQ3 | “AI should support learning, not do the whole learning process for the student” (FGS1P1). |
|  | Inclusive teaching through AI | Students see potential for AI to support inclusive pedagogy by simplifying concepts, translating materials, and creating more personalized learning experiences. | RQ3 | “It can help instructors make learning more flexible for students with different needs” (FGS2P6). |
| **10. Belonging, Voice, and Recognition in AI-Enabled Higher Education** | Feeling represented in AI systems and content | Students reflect on whether AI tools recognize their cultural, linguistic, and educational contexts, and whether the outputs make them feel represented rather than marginalized. | RQ2, RQ3 | “When AI gives examples far from our reality, it feels like students like us are not really seen” (P18). |
|  | Having a voice in AI-related decisions | Students emphasize the importance of being consulted and heard in institutional decisions, policies, and practices related to AI use in higher education. | RQ3 | “We should not only follow AI rules; we should also be asked what we think about them” (FGS3P4). |
|  | Recognition of diverse learning needs and identities | Students associate belonging with institutional and pedagogical recognition of different abilities, languages, academic backgrounds, and ways of learning in AI-supported education. | RQ2, RQ3 | “Belonging means that the system understands that students learn differently and need different kinds of support” (FGS2P5). |
|  | Trust, safety, and legitimacy in AI use | Students link belonging to feeling safe, respected, and fairly treated when using AI tools, without fear of unfair judgment, surveillance, or accusation. | RQ2 | “It is hard to feel comfortable using AI when you are always afraid that your work will be questioned” (P20). |
|  | Inclusion in institutional AI dialogue and community | Students view belonging as being part of an open academic community where they can discuss AI experiences, concerns, and expectations with faculty and peers. | RQ3 | “I would feel more included if there were honest conversations about AI between students and instructors” (FGS1P8). |
